# Supplementary material for: Unusual products arising from the tandem dehydrogenation of Mg(BH 4 ) 2 and pyrrolidine
Source: Royal Society of Chemistry journal article supplement (doi:10.1039/d5dt02376a), 2025-01-01
Supplement: d5dt02376a1.pdf [file d5dt02376a1.pdf]

# Unusual Products Arising from the Tandem Dehydrogenation of $\text{Mg}(\text{BH}_4)_2$ and Pyrrolidine

## Supplemental Information

McKinley A. Prager<sup>a</sup> and Craig M. Jensen<sup>\*a</sup>.

<sup>a</sup> a) Department of Chemistry, University of Hawaii at Manoa, Honolulu, HI 96822

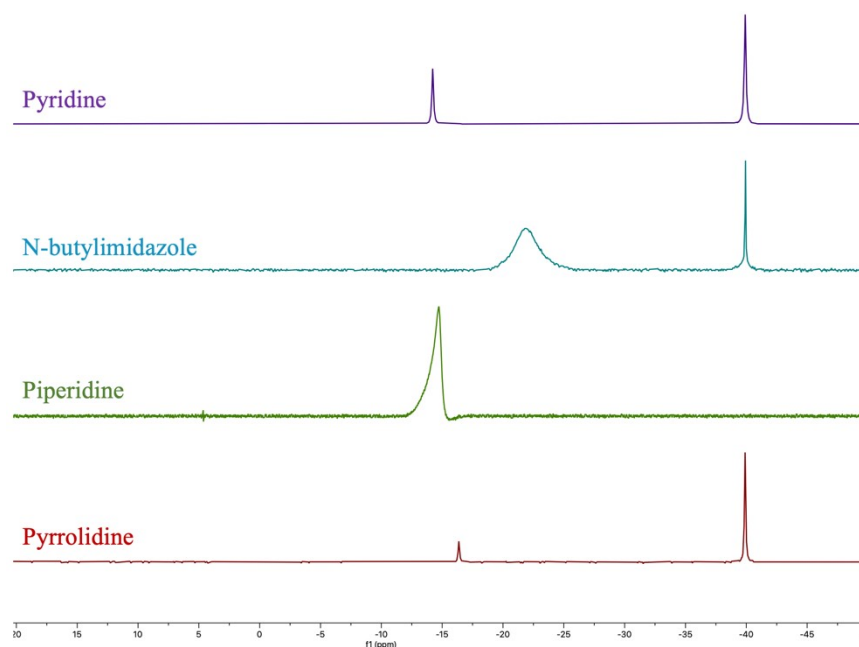

**Figure S.1.** The  $^{11}\text{B}\{^1\text{H}\}$  NMR spectra (160.45 MHz, neat unless otherwise noted) of the reaction of  $\text{Mg}(\text{BH}_4)_2$  (upfield signal) with pyridine, N-butylimidazole, piperidine and pyrrolidine at room temperature. From top to bottom, purple: ( $\text{CD}_3\text{CN}$ ) Pyridine- $\text{BH}_3$  complex at -14.2 ppm.<sup>1</sup> blue: N-butylimidazole- $\text{BH}_3$  complex at -21.9 ppm.<sup>2</sup> green: The NMR spectrum of  $\text{Mg}(\text{BH}_4)_2$  in piperidine after room temperature reaction. All of the  $\text{Mg}(\text{BH}_4)_2$  has been converted to the known borane pyridine complex seen with the broad peak at -13 ppm.<sup>1</sup> red: The NMR spectrum ( $\text{C}_6\text{D}_6$ ) of  $\text{Mg}(\text{BH}_4)_2$  and pyrrolidine, pyrrolidine- $\text{BH}_3$  is at -16 ppm.<sup>3</sup>

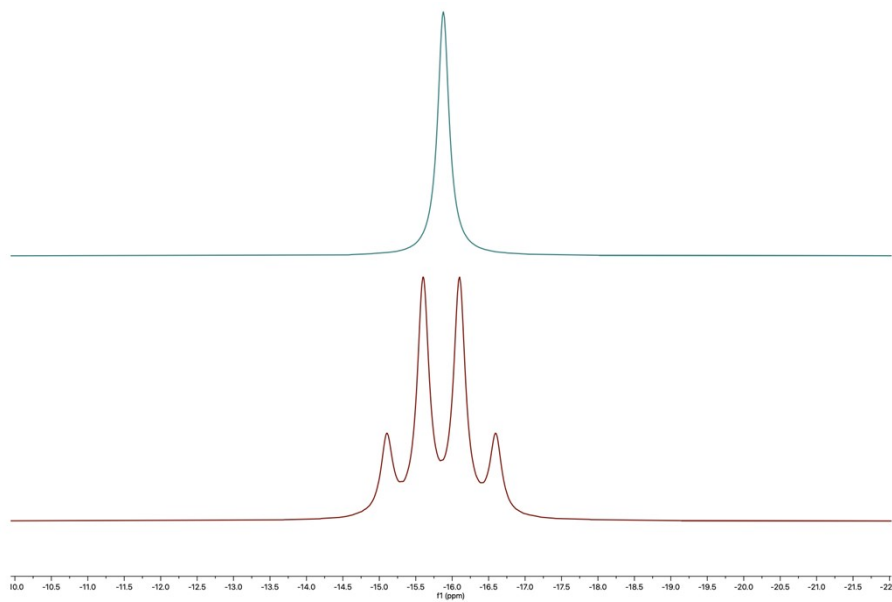

**Figure S2.** The  $^{11}\text{B}$  NMR (Bottom) and  $^{11}\text{B}\{^1\text{H}\}$  NMR (Top) (192.5 MHz,  $\text{C}_6\text{D}_6$ ,  $\delta = -16$  (q) ppm) of alternatively synthesized pyrrolidine- $\text{BH}_3$ .<sup>3</sup>

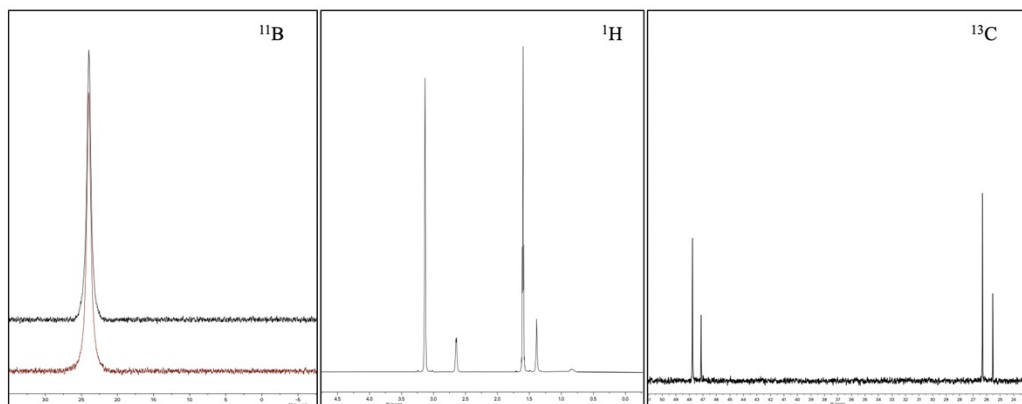

**Figure S3.** The  $^{11}\text{B}$  NMR (192.5 MHz,  $\text{C}_6\text{D}_6$ ),  $^1\text{H}$  NMR (600 MHz,  $\text{C}_6\text{D}_6$ ) and  $^{13}\text{C}$  NMR (150 MHz,  $\text{C}_6\text{D}_6$ ) spectra of 1 to 10,  $\text{Mg}(\text{BH}_4)_2$  to pyrrolidine heated to 180 °C for 24 h. There is only tris(pyrrolidino)borane and free pyrrolidine observable (pyrrolidine:  $^1\text{H}$   $\delta = 2.6, 1.4$  ppm,  $^{13}\text{C}$   $\delta = 47.1, 25.5$  ppm).

## References

- 1 P. V. Ramachandran, H. J. Hamann, and S. Mishra, *ACS Omega*, 2022, **7**, 14377-14389.
- 2 M. Reberc, M. Matjaž, J. Stare, M. Počkaj, G. Mali, X. Li, Y. Filinchuk, R. Cerný, and A. Meden, *Inorg. Chim. Acta*, 2004, **61**, 12708-12718.
- 3 S. Chitsaz, T. Breyhan, J. Pauls, B. Neumüller, *Z. Anorg. Allg. Chem.*, 2002, **628**, 956-964.
